# Supplementary material for: Experimental and computational characterization of phase transitions in CsB3H8
Source: Royal Society of Chemistry journal article supplement (doi:10.1039/d1cp02189c), 2021-01-01
Supplement: d1cp02189c1.pdf [file d1cp02189c1.pdf]

# Experimental and computational characterization of phase transitions in CsB<sub>3</sub>H<sub>8</sub>

Olena Zavorotynska<sup>1,2</sup>, Magnus H. Sørby<sup>1</sup>, Jenny G. Vitillo,<sup>3</sup> Stefano Deledda<sup>1</sup>,  
Christoph Frommen<sup>1</sup>, Bjørn C. Hauback<sup>1</sup>

<sup>1</sup>*Department for Hydrogen Technology, Institute for Energy Technology, P.O. Box 40, NO-2027 Kjeller, Norway.*

<sup>2</sup>*Department of Mathematics and Physics, University of Stavanger, P.O. Box 8600, NO-4036 Forus, Norway*

<sup>3</sup>*Department of Science and High Technology and INSTM, Università degli Studi dell'Insubria, Via Valleggio 9, I-22100 Como, Italy.*

## Content

|                                                                                                                                                                               |   |
|-------------------------------------------------------------------------------------------------------------------------------------------------------------------------------|---|
| S1. Hydration study.....                                                                                                                                                      | 2 |
| S2. Rietveld refinement of the RT phase of CsB <sub>3</sub> H <sub>8</sub> $\alpha$ -CsB <sub>3</sub> H <sub>8</sub> .....                                                    | 3 |
| S3. Calculated Raman and FTIR spectra for the three phases of CsB <sub>3</sub> H <sub>8</sub> .....                                                                           | 4 |
| S4. Analysis of the PXRD patterns of the decomposition phases.....                                                                                                            | 5 |
| S5. Crystal structures of $\alpha$ -, $\beta$ -, and $\gamma$ -CsB <sub>3</sub> H <sub>8</sub> obtained via Rietveld refinement of SR-PXRD patterns and DFT calculations..... | 6 |

### S1. Hydration study

Beside the peaks due to  $B_3H_8^-$ , the IR spectrum of the as received sample (blue curve on the figure S1) displayed other absorptions. In order to isolate absorptions by the water-related impurities, the sample was hydrated and dried. The ATR-FTIR spectra of the samples after drying and hydration are shown on Figure S1.

The peak at  $1638\text{ cm}^{-1}$  observed in as received and hydrated samples, was assigned to H-O-H bending, indicating that molecular water can be absorbed by the sample. The corresponding -OH stretching could be observed in  $3500\text{-}3000\text{ cm}^{-1}$  regions. In addition, multiple modes that are related to lattice water and hydrolysis products arise in the low-frequency region ( $<1500\text{ cm}^{-1}$ ).

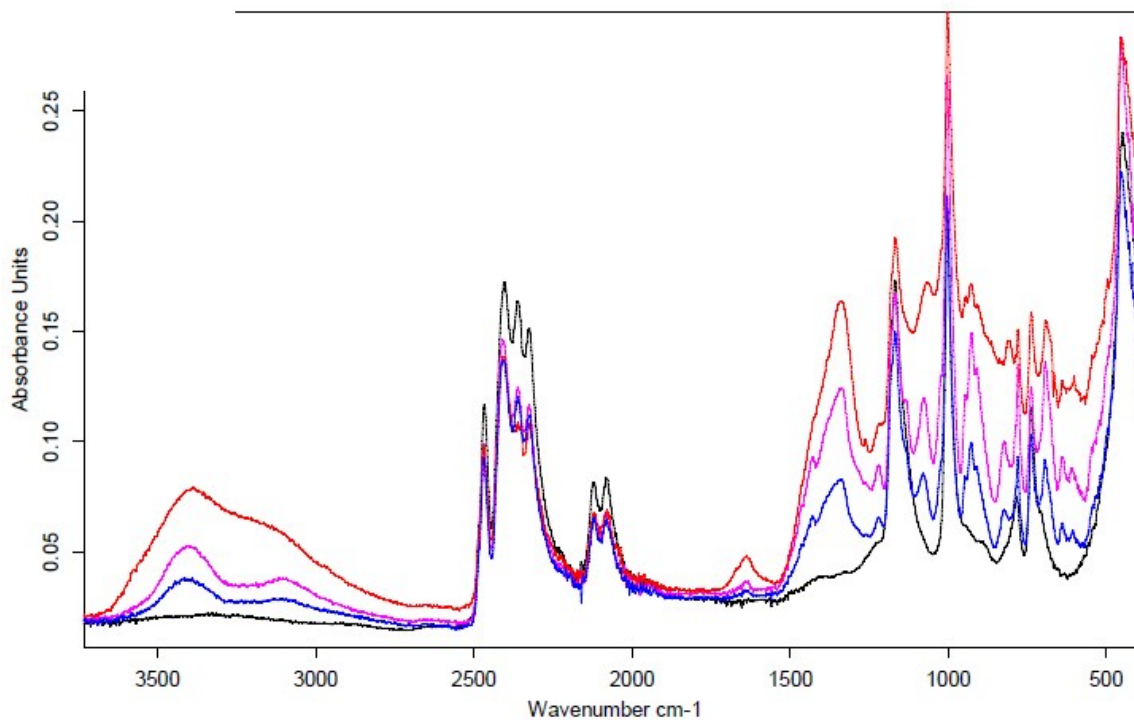

Figure S1. ATR-FTIR spectra of hydrated  $CsB_3H_8$  upon drying, **blue**: as received sample; **red**: wetted with a drop of  $H_2O$ , **pink**: dried in air in a fume hood for 1 h; **black**: dried in vacuum furnace for 18 h at  $120\text{ }^\circ\text{C}$ .

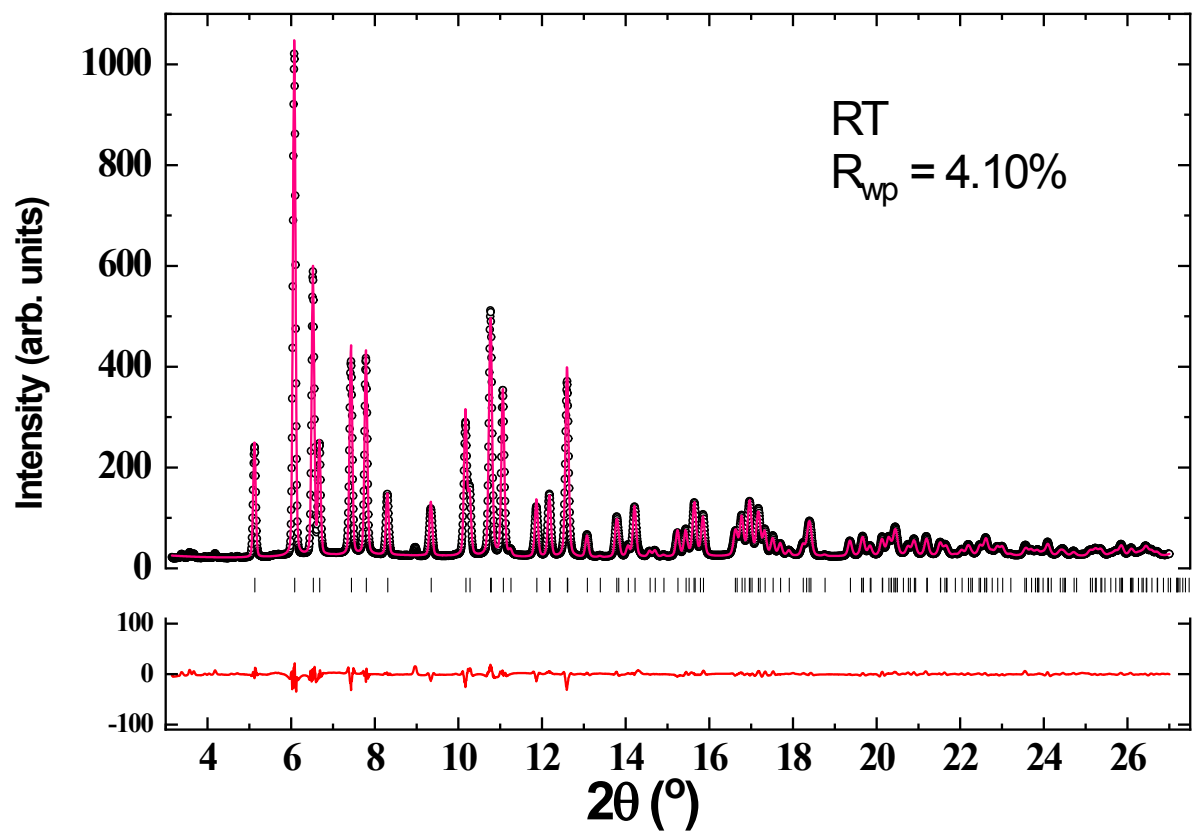

Figure S2. The Rietveld refinement of the *RT* phase of  $\text{CsB}_3\text{H}_8$   $\alpha$ - $\text{CsB}_3\text{H}_8$

S3. Calculated Raman and FTIR spectra for the three phases of  $\text{CsB}_3\text{H}_8$ .

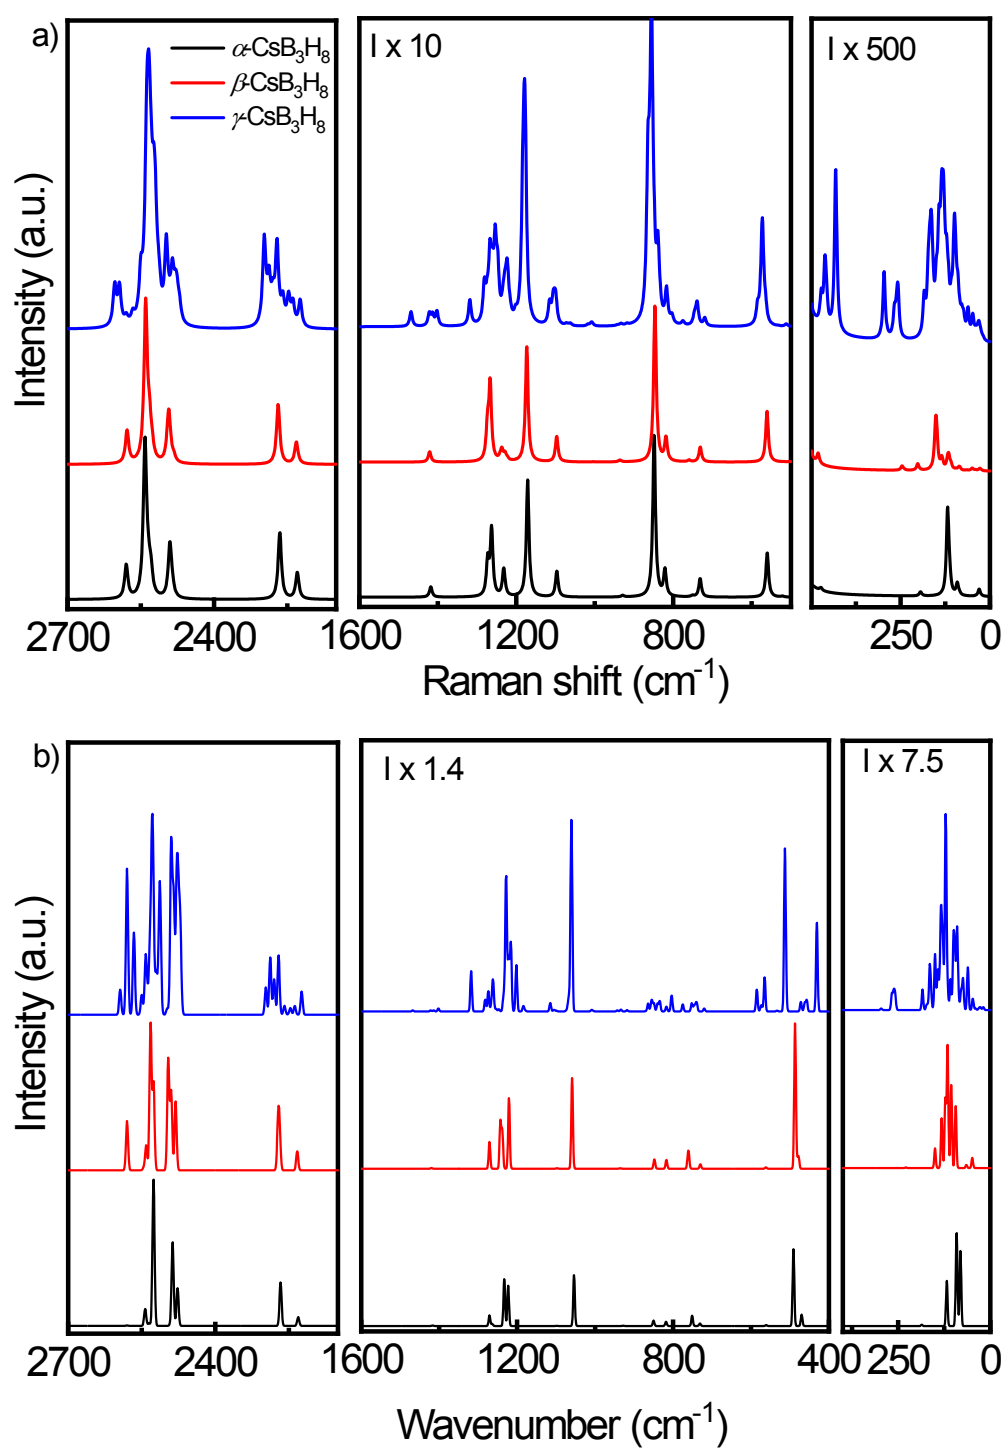

Figure S3. Calculated (a) Raman and (b) infrared spectra as obtained at the B3LYP level on periodic models of the three  $\text{CsB}_3\text{H}_8$  phases.

#### S4. Analysis of the PXRD patterns of the decomposition phases.

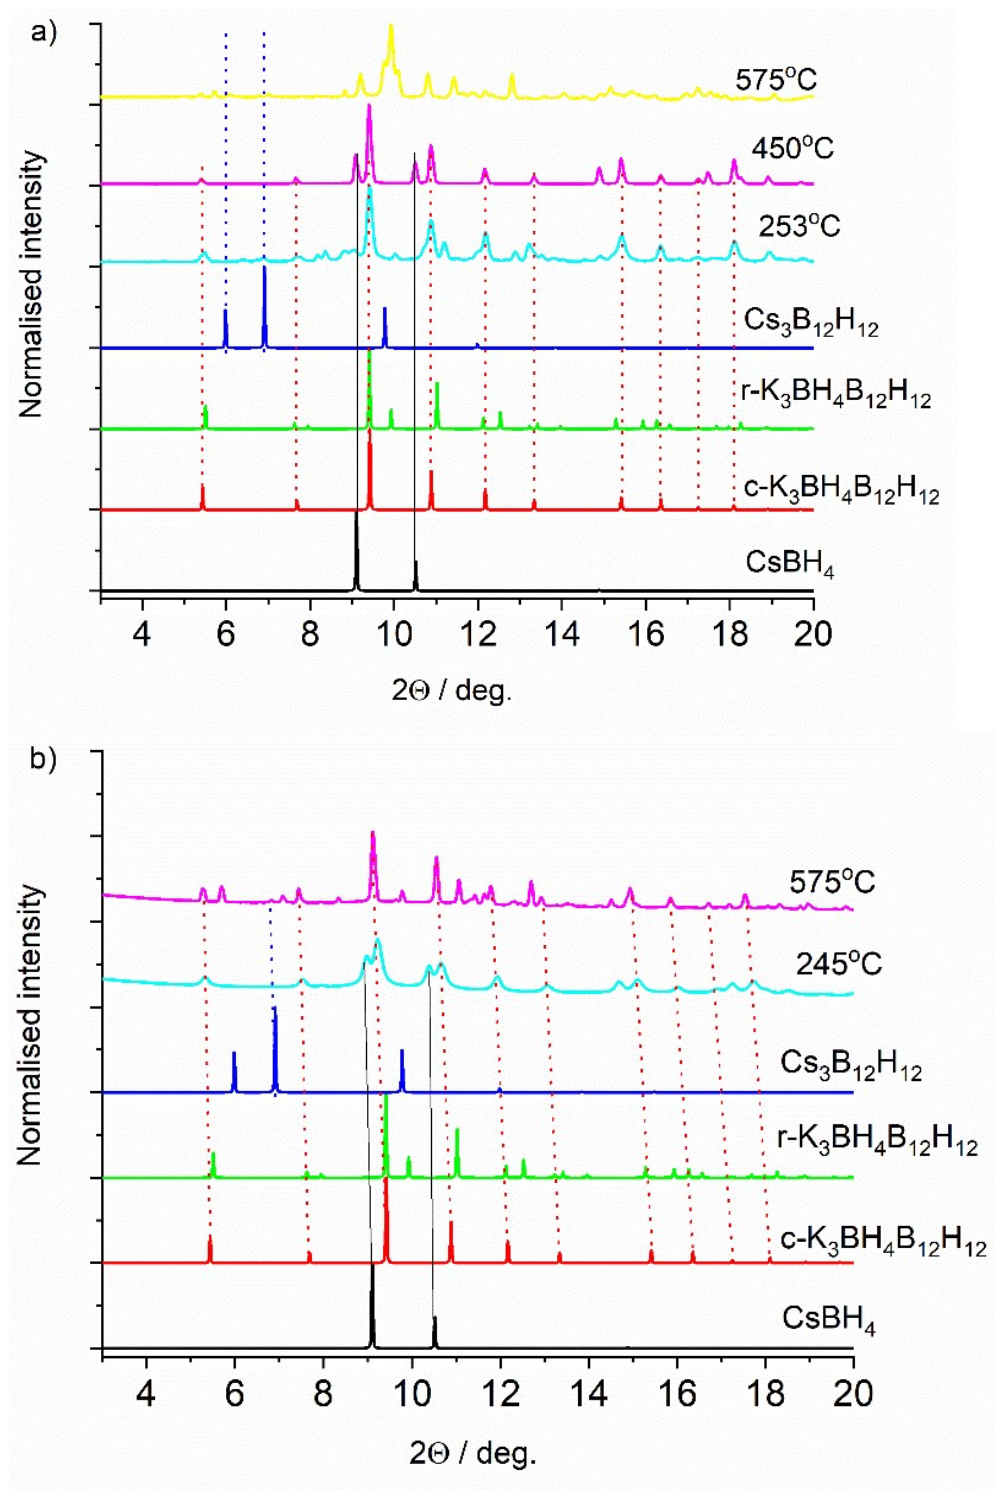

Figure S4 Phase matching of the decomposition phases with the known structures of Cs- and related hydroborates: a) ex-situ PXRD patterns obtained at RT; b) in-situ PXRD patterns obtained at the indicated temperatures with the related shifts in peak positions due to thermal expansion. The .cif files of the reference compounds were obtained from the references <sup>1 2</sup>

## S5. Crystal structures of $\alpha$ -, $\beta$ -, and $\gamma$ -CsB<sub>3</sub>H<sub>8</sub> obtained via Rietveld refinement of SR-PXRD patterns and DFT calculations

### $\alpha$ -CsB<sub>3</sub>H<sub>8</sub> (RT-phase)

Experimental: *Ama2* (No.62)  $a = 8.86567(14)$  Å,  $b = 8.66340(14)$  Å,  $c = 7.42725(13)$  Å,  $\alpha = \beta = \gamma = 90^\circ$ ;  $V = 570.463629$  Å<sup>3</sup>;  $Z=4$

Calculated: *Ama2* (No.62)  $a = 8.9881$  Å,  $b = 8.7653$  Å,  $c = 7.4220$  Å,  $\alpha = \beta = \gamma = 90^\circ$ ;  $Z=4$ ;  $V = 584.73$  Å<sup>3</sup>

| Name | WP# | Sym. | x          |        | y           |        | z         |        | Occ. | Biso (Å <sup>2</sup> )* |
|------|-----|------|------------|--------|-------------|--------|-----------|--------|------|-------------------------|
|      |     |      | exp.       | calc.  | exp.        | calc.  | exp.      | calc.  |      |                         |
| Cs1  | 4b  | m..  | 0.75       | 0.7500 | 0.17731(10) | 0.1760 | 0         | 0.9900 | 1    | 2.79(4)                 |
| B1   | 4b  | m..  | 0.75       | 0.7500 | 0.09310(15) | 0.1000 | 0.454(3)  | 0.4900 | 1    | 16.8(17)                |
| B2   | 8c  | 1    | 0.6481(10) | 0.6494 | 0.27000(11) | 0.2732 | 0.454(2)  | 0.4900 | 1    | 16.8(17)                |
| H1   | 8c  | 1    | 0.593(4)   | 0.5905 | 0.135(4)    | 0.1437 | 0.463(10) | 0.4900 | 1    | 20(4)                   |
| H2   | 4b  | m..  | 0.75       | 0.7500 | 0.001(11)   | 0.0254 | 0.327(13) | 0.3548 | 1    | 20(4)                   |
| H3   | 4b  | m..  | 0.75       | 0.7500 | 0.02(14)    | 0.0254 | 0.592(14) | 0.6251 | 1    | 20(4)                   |
| H4   | 8c  | 1    | 0.607(6)   | 0.6048 | 0.343(8)    | 0.3310 | 0.321(6)  | 0.3534 | 1    | 20(4)                   |
| H5   | 8c  | 1    | 0.603(7)   | 0.6048 | 0.332(9)    | 0.3310 | 0.592(9)  | 0.6267 | 1    | 20(4)                   |

# Wyckoff position  
\*exp.

### $\beta$ -CsB<sub>3</sub>H<sub>8</sub> (HT-1 phase)

Experimental: *Pnma* (No.62),  $a = 11.4197(3)$  Å;  $b = 8.87676(16)$  Å;  $c = 5.80554(11)$  Å,  $\alpha = \beta = \gamma = 90^\circ$ ;  $Z=4$ ;  $V = 588.505(19)$  Å<sup>3</sup>

Theoretical: *Pnma* (No.62),  $a = 11.34297$  Å,  $b = 9.03894$  Å,  $c = 5.75032$  Å,  $\alpha = \beta = \gamma = 90^\circ$ ;  $Z=4$ ;  $V = 589.571$  Å<sup>3</sup>

| Name | WP# | Sym. | x           |        | y          |        | z              |        | Occ. | Biso (Å <sup>2</sup> )* |
|------|-----|------|-------------|--------|------------|--------|----------------|--------|------|-------------------------|
|      |     |      | exp.        | calc.  | exp.       | calc.  | exp.           | calc.  |      |                         |
| Cs1  | 4   | .m.  | 0.64280(13) | 0.6594 | 0.25       | 0.2500 | 0.6536(2)      | 0.6543 | 1    | 5.69(4)                 |
| B1   | 4   | .m.  | 0.448(2)    | 0.4502 | 0.25       | 0.2500 | 0.110(5)       | 0.1500 | 1    | 7.0(5)                  |
| B2   | 8   | 1    | 0.3664(18)  | 0.3624 | 0.3498(14) | 0.3501 | 0.322(3)       | 0.3493 | 1    | 7.0(5)                  |
| H1   | 8   | 1    | 0.423(7)    | 0.4288 | 0.406(8)   | 0.4086 | 0.158(17)      | 0.2014 | 1    | 7.0(13)                 |
| H2   | 4   | .m.  | 0.416(7)    | 0.5548 | 0.25       | 0.2500 | -<br>0.089(18) | 0.1769 | 1    | 7.0(13)                 |
| H3   | 4   | .m.  | 0.556(7)    | 0.4205 | 0.25       | 0.2500 | 0.11(2)        | 0.9500 | 1    | 7.0(13)                 |
| H4   | 8   | 1    | 0.270(8)    | 0.3999 | 0.398(9)   | 0.3942 | 0.277(12)      | 0.5320 | 1    | 7.0(13)                 |
| H5   | 8   | 1    | 0.412(6)    | 0.2658 | 0.393(7)   | 0.3948 | 0.500(12)      | 0.2988 | 1    | 7.0(13)                 |

# Wyckoff position  
\*exp.

### $\gamma$ -CsB<sub>3</sub>H<sub>8</sub> (HT-2 phase)

Experimental: *Fm-3m*,  $a = 8.44149(19)$  Å;  $\alpha = \beta = \gamma = 90^\circ$ ;  $Z=4$ ;  $V = 601.53(4)$  Å<sup>3</sup>

| Name | WP# | Sym. | x         | y         | z         | Occ.  | Biso (Å <sup>2</sup> )* |
|------|-----|------|-----------|-----------|-----------|-------|-------------------------|
| Cs1  | 32f | .3m  | 0.0497(3) | 0.0497(3) | 0.9503(7) | 0.042 | 5.5(6)                  |
| B1   | 48i | m.m2 | 0.412(2)  | 0.412(2)  | 0.5       | ¼     | 10(4)                   |
| H1   | 96k | .m   | 0.357(17) | 0.58(10)  | 0.58(10)  | 0.083 | 15(15)                  |

|                    |     |     |         |         |      |   |        |
|--------------------|-----|-----|---------|---------|------|---|--------|
| H2                 | 96k | ..m | 0.41(3) | 0.69(3) | 0.25 | ¼ | 15(15) |
| # Wyckoff position |     |     |         |         |      |   |        |
| *exp.              |     |     |         |         |      |   |        |

### $\gamma$ -CsB<sub>3</sub>H<sub>8</sub> (HT-2 phase)

Theoretical: *P*3221 (No. 154), *a* = 8.44100000; *b* = 8.44100000; *c* = 8.44100000,  $\alpha=\beta=\gamma=90^\circ$ ; *Z*=24;  
*V* = 601.425307 Å<sup>3</sup>

| Name | WP# | Sym. | x        | y        | z        | Occ. |
|------|-----|------|----------|----------|----------|------|
| CS1  | 6c  | 1    | -0.00277 | 0.09463  | 0.04467  | 1    |
| CS2  | 6c  | 1    | 0.09354  | -0.3953  | -0.498   | 1    |
| CS3  | 6c  | 1    | -0.44605 | 0.11039  | -0.46272 | 1    |
| CS4  | 6c  | 1    | 0.41169  | -0.4141  | 5.8E-4   | 1    |
| B5   | 6c  | 1    | 0.49439  | -0.46044 | -0.39015 | 1    |
| B6   | 6c  | 1    | 0.48932  | -0.47032 | 0.39712  | 1    |
| H7   | 6c  | 1    | 0.43977  | 0.42044  | -0.33377 | 1    |
| H8   | 6c  | 1    | 0.43067  | -0.34016 | -0.34835 | 1    |
| H9   | 6c  | 1    | -0.37801 | -0.46815 | 0.33125  | 1    |
| H10  | 6c  | 1    | -0.2598  | -0.3341  | 0.49144  | 1    |
| H11  | 6c  | 1    | 0.42575  | -0.35295 | 0.34821  | 1    |
| B12  | 6c  | 1    | -0.32825 | -0.45767 | 0.49873  | 1    |
| H13  | 6c  | 1    | -0.37056 | -0.45085 | -0.33051 | 1    |
| H14  | 6c  | 1    | -0.24596 | 0.42648  | -0.49732 | 1    |
| H15  | 6c  | 1    | 0.43123  | 0.4068   | 0.35384  | 1    |
| B16  | 6c  | 1    | 0.43402  | 0.04791  | -0.05805 | 1    |
| B17  | 6c  | 1    | -0.41951 | -0.00134 | 0.08237  | 1    |
| H18  | 6c  | 1    | -0.42002 | 0.06484  | -0.0804  | 1    |
| H19  | 6c  | 1    | 0.38196  | 0.17839  | -0.0812  | 1    |
| H20  | 6c  | 1    | 0.49019  | -0.0623  | 0.2244   | 1    |
| H21  | 6c  | 1    | 0.33333  | 0.10915  | 0.21606  | 1    |
| H22  | 6c  | 1    | -0.34547 | 0.10218  | 0.14521  | 1    |
| B23  | 6c  | 1    | 0.38107  | -0.00375 | 0.1436   | 1    |
| H24  | 6c  | 1    | 0.39355  | -0.05174 | -0.15183 | 1    |
| H25  | 6c  | 1    | 0.28874  | -0.11179 | 0.13407  | 1    |
| H26  | 6c  | 1    | -0.34751 | -0.12086 | 0.0571   | 1    |
| B27  | 6c  | 1    | -0.0335  | 0.03117  | 0.43688  | 1    |
| B28  | 6c  | 1    | -0.05124 | -7.1E-4  | -0.35377 | 1    |
| H29  | 6c  | 1    | -0.10883 | 0.14636  | 0.40024  | 1    |
| H30  | 6c  | 1    | -0.06445 | -0.08702 | 0.36354  | 1    |
| H31  | 6c  | 1    | 0.07789  | -2.8E-4  | -0.28109 | 1    |
| H32  | 6c  | 1    | 0.23067  | -0.06196 | -0.45255 | 1    |
| H33  | 6c  | 1    | -0.10168 | -0.13137 | -0.32968 | 1    |
| B34  | 6c  | 1    | 0.13505  | 0.04256  | -0.44048 | 1    |
| H35  | 6c  | 1    | 0.10335  | 0.06635  | 0.39172  | 1    |
| H36  | 6c  | 1    | 0.18929  | 0.17034  | -0.41128 | 1    |
| H37  | 6c  | 1    | -0.12595 | 0.1048   | -0.29348 | 1    |
| B38  | 6c  | 1    | 0.02424  | -0.4892  | -0.09955 | 1    |
| B39  | 6c  | 1    | 0.01409  | -0.46866 | 0.11246  | 1    |
| H40  | 6c  | 1    | 0.09343  | 0.39151  | -0.13572 | 1    |
| H41  | 6c  | 1    | 0.07979  | -0.36932 | -0.15216 | 1    |
| H42  | 6c  | 1    | -0.12224 | -0.46901 | 0.16963  | 1    |
| H43  | 6c  | 1    | -0.23788 | -0.36956 | -0.01574 | 1    |
| H44  | 6c  | 1    | 0.06583  | -0.34094 | 0.14838  | 1    |
| B45  | 6c  | 1    | -0.16059 | -0.48714 | -0.00162 | 1    |
| H46  | 6c  | 1    | -0.10669 | 0.49907  | -0.16771 | 1    |
| H47  | 6c  | 1    | -0.23381 | 0.39132  | 0.00683  | 1    |
| H48  | 6c  | 1    | 0.07846  | 0.4208   | 0.17596  | 1    |

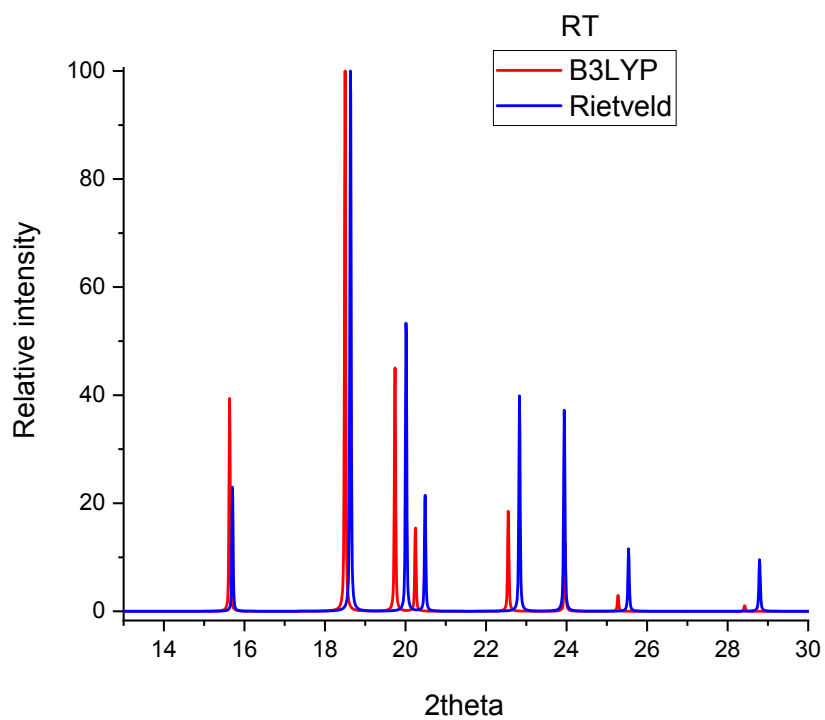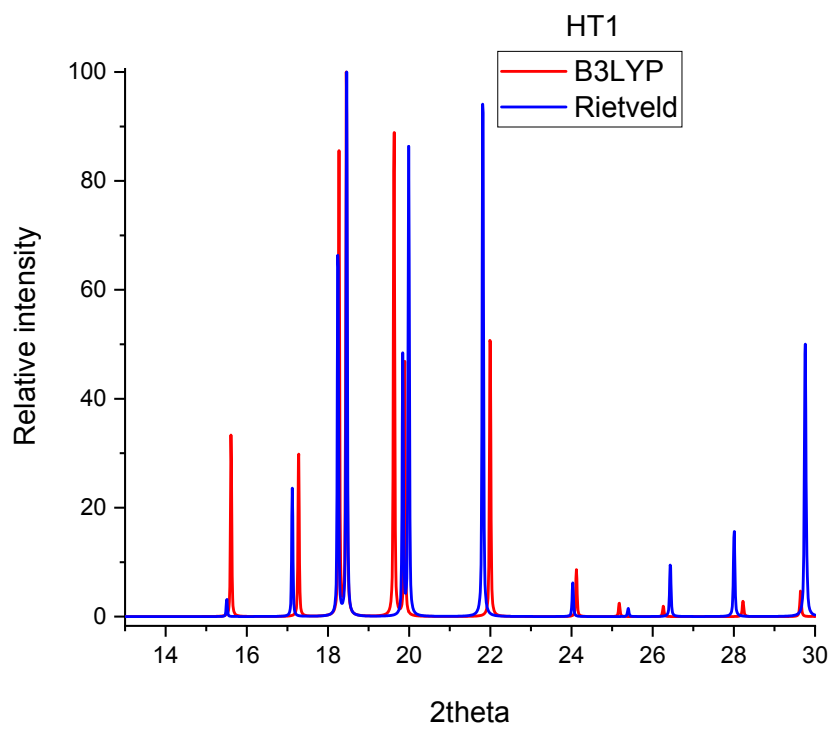



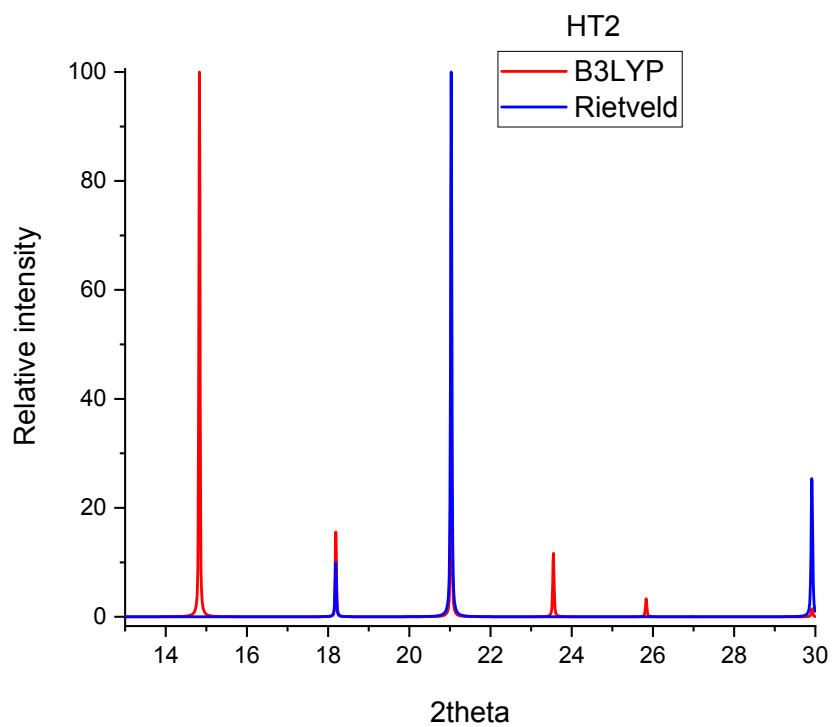

Figure S5. Comparison of the simulated XRD patterns of the three structures of  $\text{CsB}_3\text{H}_8$  obtained with Rietveld refinement and DFT calculations. The patterns are simulated with the  $\lambda = 1.54 \text{ \AA}$ .

#### References

1. Y. Sadikin, R. V. Skoryunov, O. A. Babanova, A. V. Soloninin, Z. Lodziana, M. Brighi, A. V. Skripov and R. Černý, *The Journal of Physical Chemistry C*, 2017, **121**, 5503-5514.
2. I. Tiritiris, T. Schleid, K. Müller and W. Preetz, *Zeitschrift für anorganische und allgemeine Chemie*, 2000, **626**, 323-325.
